# Supplementary material
Source: Springer Nature journal article supplement (https://www.springermedizin.de/resource/supplementary/12865_2005_79_MOESM4_ESM.pdf/9428466)

**Control**

**Carrageenan**

**Saline**

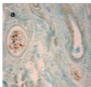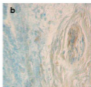

**oATP  
Local**

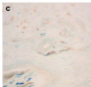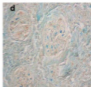

**oATP  
LV.**

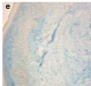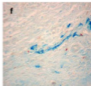

Supplement: MOESM4 [file 9428466]
